# Supplementary material for: Effects of n-3 fatty acid supplements on cardiometabolic profiles in hypertensive patients with abdominal obesity in Inner Mongolia: a randomized controlled trial
Source: Royal Society of Chemistry journal article supplement (doi:10.1039/c8fo01707g), 2019-01-01
Supplement: c8fo01707g1.pdf [file c8fo01707g1.pdf]

**Effects of n-3 fatty acid supplements on cardiometabolic profiles in hypertensive patients  
with abdominal obesity in Inner Mongolia: A randomized controlled trial**

Bo Yang<sup>1</sup>, Mei-qi Shi<sup>2</sup>, Zi-hao Li<sup>2</sup>, Lin Shi<sup>3</sup>, Ai-min Wang<sup>3</sup>, Xiao-juan Guo<sup>1\*</sup>, Duo Li<sup>4,2\*</sup>

<sup>1</sup>Institute of Lipids Medicine, Wenzhou Medical University, Wenzhou, China

<sup>2</sup>Department of Food Science and Nutrition, Zhejiang University, Hangzhou, China

<sup>3</sup>Ejin Horo Banner Centre for Disease Prevention and Control, Ordos, Inner Mongolia, China

<sup>4</sup>Institute of Nutrition & Health, Qingdao University, Qingdao, China

**\*Co-corresponding Author:**

Prof. Xiao-juan Guo

Institute of Lipids Medicine, Wenzhou Medical University

Chashan University Town, Wenzhou, China, 325035

Phone: +86-577-82991018; Fax: +86-577-86689848;

E-mail: [gxj@wmu.edu.cn](mailto:gxj@wmu.edu.cn)

**\*Corresponding Author:**

Prof. Duo Li

Institute of Nutrition & Health, Qingdao University

308 Ningxia Road, Qingdao, China, 266003

Phone: +86-532-82991018; Fax: +86-532-82991018;

E-mail: [duoli@qdu.edu.cn](mailto:duoli@qdu.edu.cn)

**Table S1. Baseline dietary intake of nutrients in the intention-to-treat patients (n=108)**

| Nutrients intake          | FO (n=34)      | FLO (n=39)     | CO (n=35)      | <i>P</i> <sup>1</sup> |
|---------------------------|----------------|----------------|----------------|-----------------------|
| Total energy, kcal        | 2243.11±668.85 | 2178.97±634.78 | 2111.87±593.64 | 0.72                  |
| Carbohydrate, g           | 339.10± 91.20  | 353.77± 103.96 | 325.88± 88.18  | 0.48                  |
| Total fat, g              | 66.39± 25.93   | 56.70± 27.50   | 63.60± 28.84   | 0.32                  |
| Protein, g                | 91.32±39.04    | 93.25±35.33    | 88.04±31.88    | 0.84                  |
| Vitamin C, mg             | 71.38±32.97    | 77.46±33.52    | 63.09±31.28    | 0.20                  |
| Vitamin E, mg             | 16.48±10.02    | 14.74±7.40     | 13.83±6.83     | 0.32                  |
| Sodium, mg                | 2359.47±890.10 | 2351.68±856.67 | 2323.92±923.62 | 0.62                  |
| Potassium , mg            | 1843.56±554.34 | 1982.74±753.51 | 1794.53±625.22 | 0.46                  |
| Calcium, mg               | 562.20± 348.65 | 554.21±325.34  | 587.85±346.26  | 0.90                  |
| Magnesium, mg             | 455.11± 195.96 | 411.68±181.06  | 427.78± 200.77 | 0.64                  |
| Dietary fiber, g          | 33.38±19.85    | 29.33±17.06    | 30.57±19.18    | 0.65                  |
| Saturated Fat, g          | 9.51± 6.69     | 11.23±10.39    | 11.96±12.89    | 0.14                  |
| Monounsaturated fat, g    | 6.56±5.22      | 6.37± 4.18     | 8.73± 8.32     | 0.80                  |
| Polyunsaturated fat, g    | 12.13±7.30     | 12.31±7.87     | 11.24±7.14     | 0.55                  |
| Saturated/polyunsaturated | 0.90±0.20      | 0.94±0.14      | 1.02±0.23      | 0.07                  |

Values are presented as mean ± SD.

<sup>1</sup>*P* value was calculated by One-way ANOVA to indicate the difference between groups.

## Figure S1-S2:

**Figure S1. Changes in erythrocyte phospholipids compositions of n-3 fatty acids by treatment groups.** Groups sharing the same superscript (a or b) have no significant difference from each other in the post hoc analysis ( $p \geq 0.05$ ) after adjustment for age, gender, ethnicity, current drug treatments, baseline corresponding fatty acid and changes in BMI. ALA, alpha-linolenic acid (18:3n3); EPA, eicosapentaenoic acid (20:5n3); DHA, docosahexaenoic acid (22:6n3).

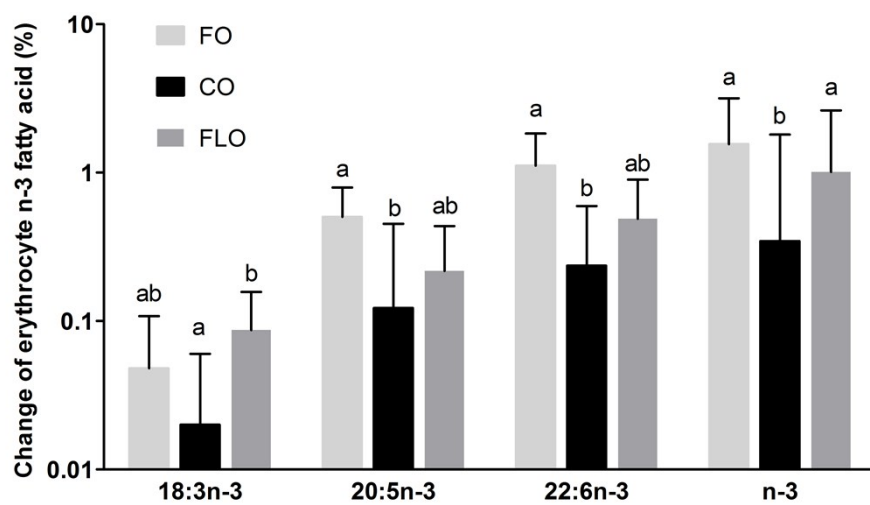

Figure S1. Changes in erythrocyte phospholipids compositions of individual or total n-3 fatty acids by treatment groups.

**Figure S2. Changes in cardiometabolic scores in both intention-to-treat and pre-protocol participants by treatment groups.** The mean changes in CMD scores were compared between pre-protocol (PP) and intention-to-treat (ITT) analyses. CMD changes were indicated by lightgray bar in PP analysis and black bar in ITT analysis, with a corresponding confidence interval (CI) represented by the black error bars.

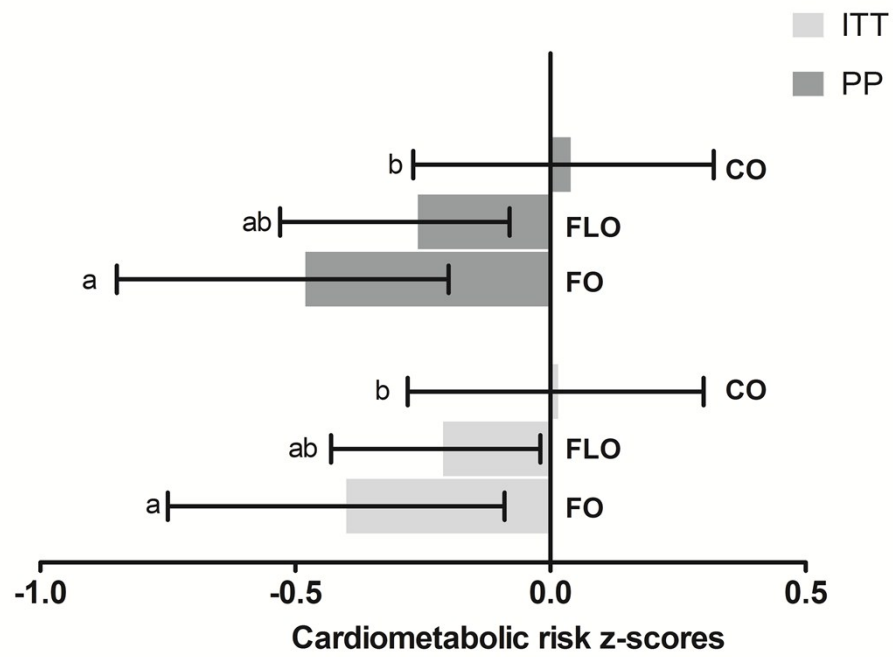

Figure S2. Changes in cardiometabolic risk scores in both intention-to-treat and pre-protocol participants by treatment groups
